# Supplementary material for: Reductive reactions via excess Li in mixture electrolytes of Li ion batteries: an ab initio molecular dynamics study
Source: Royal Society of Chemistry journal article supplement (doi:10.1039/c8cp04907f), 2019-01-01
Supplement: c8cp04907f1.pdf [file c8cp04907f1.pdf]

# Reductive Reactions via Li excess in Mixture Electrolytes of Li Ion Battery: *Ab-initio* Molecular Dynamics Study

Woon Ih Choi\*, Min Sik Park, Youngseon Shim, Hyosug Lee, Dong Young Kim, Yoon-Sok Kang, Meiten Koh

Samsung Advanced Institute of Technology, Samsung Electronics, 130 Samsung-ro, Suwon, Gyeonggi-do 16678, Republic of Korea

Supporting Information

**Table S1. Reaction Products of EC+DMC+LiPF<sub>6</sub> electrolytes after 5 ps of molecular dynamics run.**

| Electrolyte Composition |     |                   |           | Gas molecules |                 |                               | PF <sub>6</sub> <sup>-</sup> |                              | Inorganic Salt        |                               | Organic Salt           |                 |
|-------------------------|-----|-------------------|-----------|---------------|-----------------|-------------------------------|------------------------------|------------------------------|-----------------------|-------------------------------|------------------------|-----------------|
| EC                      | DMC | LiPF <sub>6</sub> | Li Excess | CO            | CO <sub>2</sub> | C <sub>2</sub> H <sub>4</sub> | PF <sub>3</sub>              | PF <sub>2</sub> <sup>-</sup> | LiF (F <sup>-</sup> ) | CO <sub>3</sub> <sup>2-</sup> | Anion Radical (ch × #) | Merged (ch × #) |
|                         |     |                   | 4         |               |                 | 1                             |                              |                              |                       | 1                             |                        | 1 (-2×1)        |
|                         |     |                   | 8         |               |                 | 2                             | 1                            |                              | 3                     | 1                             |                        | 3 (-2×1, -1×2)  |
| 25                      | 25  | 4                 | 12        | 1             |                 | 1                             | 1                            |                              | 3                     | 1                             | 3 (-2×2, -1×1)         | 1 (-3×1)        |
|                         |     |                   | 16        | 1             |                 | 3                             | 2                            | 1                            | 10                    | 3                             | 1 (-2×1)               |                 |
|                         |     |                   | 20        | 3             |                 | 1                             | 3                            |                              | 9                     | 1                             | 8 (-1×6, -2×2)         | 1 (-2×1)        |
|                         |     |                   | 4         |               |                 | 2                             |                              |                              |                       | 2                             |                        |                 |
|                         |     |                   | 8         |               |                 | 2                             |                              |                              |                       | 2                             | 1 (-2×1)               | 1 (-2×1)        |
| 40                      | 10  | 4                 | 12        |               |                 | 4                             | 1                            |                              | 3                     | 4                             |                        | 1 (-2×1)        |
|                         |     |                   | 16        |               |                 | 6                             | 1                            |                              | 3                     | 6                             |                        | 1 (-2×1)        |
|                         |     |                   | 20        | 1             |                 | 5                             |                              |                              |                       | 5                             | 4 (-2×3, -1×1)         | 2 (-2×1, -1×1)  |

**Table S2. Reaction Products of FEC+DMC+LiPF<sub>6</sub> electrolytes after 5 ps of molecular dynamics run.**

| Electrolyte Composition |     |                   |           | Gas molecules |                 |                                 | PF <sub>6</sub> <sup>-</sup> | Inorganic Salt        |                               | Organic Salt           |                 |
|-------------------------|-----|-------------------|-----------|---------------|-----------------|---------------------------------|------------------------------|-----------------------|-------------------------------|------------------------|-----------------|
| FEC                     | DMC | LiPF <sub>6</sub> | Excess Li | CO            | CO <sub>2</sub> | C <sub>2</sub> H <sub>3</sub> F | PF <sub>3</sub>              | LiF (F <sup>-</sup> ) | CO <sub>3</sub> <sup>2-</sup> | Anion Radical (ch × #) | Merged (ch × #) |
| 25                      | 25  | 4                 | 4         | 2             |                 |                                 |                              | 2                     |                               | 1 (-1×1)               | 1 (-1×1)        |
|                         |     |                   | 8         | 4             |                 |                                 | 3                            |                       | 5 (-1×5)                      |                        |                 |
|                         |     |                   | 12        | 6             |                 |                                 | 6                            |                       | 6 (-1×6)                      |                        |                 |
|                         |     |                   | 16        | 6             | 1               |                                 | 7                            | 1                     | 7 (-1×7)                      |                        |                 |
|                         |     |                   | 20        | 4             | 1               | 1                               | 12                           | 1                     | 6 (-1×6)                      | 1 (-1×1)               |                 |
| 40                      | 10  | 4                 | 4         | 2             |                 |                                 |                              | 1                     |                               | 3 (-1×3)               |                 |
|                         |     |                   | 8         | 1             | 1               |                                 | 3                            | 1                     | 2 (-1×2)                      | 1 (-1×1)               |                 |
|                         |     |                   | 12        | 3             | 1               | 1                               | 6                            | 1                     | 4 (-1×4)                      | 1 (0×1)                |                 |
|                         |     |                   | 16        | 2             |                 | 2                               | 12                           |                       | 5 (-1×5)                      | 1 (-1×1)               |                 |
|                         |     |                   | 20        | 4             | 1               | 1                               | 2                            | 13                    | 1                             | 7 (-1×7)               | 1 (0×1)         |

**Table S3. Reaction Products of EC+DMC+LiPF<sub>6</sub> electrolytes after 5 ps of molecular dynamics run. Reactions with Li<sup>+</sup> excess are compared with excess electron only case.**

| Electrolyte Composition |     |                   |           | Gas molecules |                 |                               | PF <sub>6</sub> <sup>-</sup> |                              | Inorganic Salt        |                               | Organic Salt                                                                       |                                                                             |
|-------------------------|-----|-------------------|-----------|---------------|-----------------|-------------------------------|------------------------------|------------------------------|-----------------------|-------------------------------|------------------------------------------------------------------------------------|-----------------------------------------------------------------------------|
| EC                      | DMC | LiPF <sub>6</sub> | Li Excess | CO            | CO <sub>2</sub> | C <sub>2</sub> H <sub>4</sub> | PF <sub>3</sub>              | PF <sub>2</sub> <sup>-</sup> | LiF (F <sup>-</sup> ) | CO <sub>3</sub> <sup>2-</sup> | Anion Radical (ch <sub>1</sub> ×# <sub>1</sub> , ch <sub>2</sub> ×# <sub>2</sub> ) | Merged (ch <sub>1</sub> ×# <sub>1</sub> , ch <sub>2</sub> ×# <sub>2</sub> ) |
|                         |     |                   | 4         |               |                 | 2                             |                              |                              |                       | 2                             |                                                                                    |                                                                             |
|                         |     |                   | 8         |               |                 | 2                             |                              |                              |                       | 2                             | 1 (-2×1)                                                                           | 1 (-2×1)                                                                    |
| 40                      | 10  | 4                 | 12        |               |                 | 4                             | 1                            |                              | 3                     | 4                             |                                                                                    | 1 (-2×1)                                                                    |
|                         |     |                   | 16        |               |                 | 6                             | 1                            |                              | 3                     | 6                             |                                                                                    | 1 (-2×1)                                                                    |
|                         |     |                   | 20        | 1             |                 | 5                             |                              |                              |                       | 5                             | 4 (-2×3, -1×1)                                                                     | 2 (-2×1, -1×1)                                                              |
|                         |     |                   | 4e        |               |                 | 1                             |                              |                              |                       | 1                             | 1 (-2×1)                                                                           |                                                                             |
|                         |     |                   | 8e        |               |                 | 2                             |                              |                              |                       | 2                             | 1 (-2×1)                                                                           | 1 (-2×1)                                                                    |
| 40                      | 10  | 4                 | 12e       | 2             |                 | 2                             |                              |                              |                       | 2                             | 4 (-2×4)                                                                           |                                                                             |
|                         |     |                   | 16e       |               |                 | 6                             |                              |                              |                       | 6                             |                                                                                    | 2 (-2×2)                                                                    |
|                         |     |                   | 20e       | 1             |                 | 5                             |                              |                              |                       | 4                             | 2 (-2×1, -1×1)                                                                     | 5 (-2×4, -1×1)                                                              |
| Electrolyte Composition |     |                   |           | Gas molecules |                 |                               | PF <sub>6</sub> <sup>-</sup> |                              | Inorganic Salt        |                               | Organic Salt                                                                       |                                                                             |
| EC                      | DMC | LiPF <sub>6</sub> | Li Excess | CO            | CO <sub>2</sub> | C <sub>2</sub> H <sub>4</sub> | PF <sub>3</sub>              | PF <sub>2</sub> <sup>-</sup> | LiF (F <sup>-</sup> ) | CO <sub>3</sub> <sup>2-</sup> | Anion Radical (ch <sub>1</sub> ×# <sub>1</sub> , ch <sub>2</sub> ×# <sub>2</sub> ) | Merged (ch <sub>1</sub> ×# <sub>1</sub> , ch <sub>2</sub> ×# <sub>2</sub> ) |
|                         |     |                   | 4         |               |                 | 1                             |                              |                              |                       | 1                             |                                                                                    | 1 (-2×1)                                                                    |
|                         |     |                   | 8         |               |                 | 2                             | 1                            |                              | 3                     | 1                             |                                                                                    | 3 (-2×1, -1×2)                                                              |
| 25                      | 25  | 4                 | 12        | 1             |                 | 1                             | 1                            |                              | 3                     | 1                             | 3 (-2×2, -1×1)                                                                     | 1 (-3×1)                                                                    |
|                         |     |                   | 16        | 1             |                 | 3                             | 2                            | 1                            | 10                    | 3                             | 1 (-2×1)                                                                           |                                                                             |
|                         |     |                   | 20        | 3             |                 | 1                             | 3                            |                              | 9                     | 1                             | 8 (-2×2, -1×6)                                                                     | 1 (-2×1)                                                                    |
|                         |     |                   | 4e        |               |                 | 1                             |                              |                              |                       |                               |                                                                                    | 2 (-2×2)                                                                    |
|                         |     |                   | 8e        | 2             |                 | 1                             |                              |                              |                       | 1                             | 3 (-2×3)                                                                           |                                                                             |
| 25                      | 25  | 4                 | 12e       | 2             |                 | 3                             |                              |                              |                       | 3                             | 2 (-2×2)                                                                           | 1 (-2×1)                                                                    |
|                         |     |                   | 16e       |               |                 | 5                             | 1                            |                              | 3                     | 5                             | 2 (-2×2)                                                                           |                                                                             |
|                         |     |                   | 20e       | 1             |                 | 7                             | 1                            |                              | 3                     | 7                             | 3 (-1×2, -2×1)                                                                     |                                                                             |

**Table S4. Reaction Products of FEC+DMC+LiPF<sub>6</sub> electrolytes after 5 ps of molecular dynamics run.**

Reactions with Li<sup>+</sup> excess are compared with excess electron only case.

| Electrolyte Composition |     |                   |           | Gas molecules |                 |                                    | PF <sub>6</sub> <sup>-</sup> | Inorganic Salt           |                               | Organic Salt  |          |
|-------------------------|-----|-------------------|-----------|---------------|-----------------|------------------------------------|------------------------------|--------------------------|-------------------------------|---------------|----------|
| FEC                     | DMC | LiPF <sub>6</sub> | Excess Li | CO            | CO <sub>2</sub> | C <sub>2</sub> H <sub>3</sub><br>F | PF <sub>3</sub>              | LiF<br>(F <sup>-</sup> ) | CO <sub>3</sub> <sup>2-</sup> | Anion Radical | Merged   |
|                         |     |                   | 4         | 2             |                 |                                    |                              | 1                        |                               | 3 (-1×3)      |          |
|                         |     |                   | 8         | 1             |                 | 1                                  |                              | 3                        | 1                             | 2 (-1×2)      | 1 (-1×1) |
| 40                      | 10  | 4                 | 12        | 3             | 1               | 1                                  |                              | 6                        | 1                             | 4 (-1×4)      | 1 (0×1)  |
|                         |     |                   | 16        | 2             |                 |                                    | 2                            | 12                       |                               | 5 (-1×5)      | 1 (-1×1) |
|                         |     |                   | 20        | 4             | 1               | 1                                  | 2                            | 13                       | 1                             | 7 (-1×7)      | 1 (0×1)  |
|                         |     |                   | 4e        |               |                 | 1                                  |                              | 1                        | 1                             | 1 (-1×1)      |          |
|                         |     |                   | 8e        | 4             |                 |                                    |                              | 3                        |                               | 3 (-1×3)      | 1 (-1×1) |
| 40                      | 10  | 4                 | 12e       | 5             |                 |                                    |                              | 6                        |                               | 6 (-1×6)      |          |
|                         |     |                   | 16e       | 7             |                 |                                    |                              | 7                        |                               | 9 (-1×9)      |          |
|                         |     |                   | 20e       | 7             |                 |                                    |                              | 10                       |                               | 10 (-1×10)    | 1 (0×1)  |
| Electrolyte Composition |     |                   |           | Gas molecules |                 |                                    | PF <sub>6</sub> <sup>-</sup> | Inorganic Salt           |                               | Organic Salt  |          |
| FEC                     | DMC | LiPF <sub>6</sub> | Excess Li | CO            | CO <sub>2</sub> | C <sub>2</sub> H <sub>3</sub><br>F | PF <sub>3</sub>              | LiF<br>(F <sup>-</sup> ) | CO <sub>3</sub> <sup>2-</sup> | Anion Radical | Merged   |
|                         |     |                   | 4         | 2             |                 |                                    |                              | 2                        |                               | 1 (-1×1)      | 1 (-1×1) |
|                         |     |                   | 8         | 4             |                 |                                    |                              | 3                        |                               | 5 (-1×5)      |          |
| 25                      | 25  | 4                 | 12        | 6             |                 |                                    |                              | 6                        |                               | 6 (-1×6)      |          |
|                         |     |                   | 16        | 6             |                 | 1                                  |                              | 7                        | 1                             | 7 (-1×7)      |          |
|                         |     |                   | 20        | 4             |                 | 1                                  | 1                            | 12                       | 1                             | 6 (-1×6)      | 1 (-1×1) |
|                         |     |                   | 4e        |               |                 | 1                                  |                              | 1                        | 1                             | 1 (-1×1)      |          |
|                         |     |                   | 8e        | 3             |                 | 1                                  |                              | 3                        | 1                             | 3 (-1×3)      |          |
| 25                      | 25  | 4                 | 12e       | 3             |                 | 1                                  |                              | 5                        |                               | 7(-1×7)       |          |
|                         |     |                   | 16e       | 5             |                 | 1                                  |                              | 6                        | 1                             | 8(-1×8)       |          |
|                         |     |                   | 20e       | 4             |                 | 1                                  |                              | 8                        | 1                             | 9(-1×9)       | 1 (-1×1) |

**Table S5. Reaction Products of EC+DMC+LiPF<sub>6</sub> electrolytes after 5 ps of molecular dynamics run. Instead of dumping 12 electrons, various electron transfer rate is examined. Boldfaced cases indicate solvated electrons that do not participate bond breaking reaction yet.**

| Electrolyte Composition |     |                   |                       | Gas molecules |                 |                               | PF <sub>6</sub> <sup>-</sup> |                              | Inorganic Salt        |                               | Organic Salt                                                                       |                                                                             |                 |
|-------------------------|-----|-------------------|-----------------------|---------------|-----------------|-------------------------------|------------------------------|------------------------------|-----------------------|-------------------------------|------------------------------------------------------------------------------------|-----------------------------------------------------------------------------|-----------------|
| EC                      | DMC | LiPF <sub>6</sub> | $\Delta n_e \times N$ | CO            | CO <sub>2</sub> | C <sub>2</sub> H <sub>4</sub> | PF <sub>3</sub>              | PF <sub>4</sub> <sup>-</sup> | LiF (F <sup>-</sup> ) | CO <sub>3</sub> <sup>2-</sup> | Anion Radical (ch <sub>1</sub> ×# <sub>1</sub> , ch <sub>2</sub> ×# <sub>2</sub> ) | Merged (ch <sub>1</sub> ×# <sub>1</sub> , ch <sub>2</sub> ×# <sub>2</sub> ) |                 |
| 25                      | 25  | 4                 | +2e×6                 |               |                 | 4                             |                              |                              |                       | 4                             | 3 (-1×3)                                                                           | 1 (-1×1)                                                                    |                 |
|                         |     |                   | <b>+4e×3</b>          |               |                 |                               |                              | <b>1</b>                     | <b>2</b>              | <b>2</b>                      | <b>1 (-2×1)</b>                                                                    | <b>1 (-2×1)</b>                                                             |                 |
|                         |     |                   | <b>+6e×2</b>          |               |                 | 2                             |                              |                              |                       |                               | <b>2</b>                                                                           | <b>2 (-1×2)</b>                                                             | <b>2 (-2×2)</b> |
|                         |     |                   | +12e×1                | 1             |                 | 1                             |                              | 1                            | 2                     | 1                             | 3(-2×2, -1×1)                                                                      | 1 (-3×1)                                                                    |                 |
| 40                      | 10  | 4                 | <b>+2e×6</b>          |               |                 | <b>3</b>                      |                              |                              |                       | <b>2</b>                      | <b>1 (-2×1)</b>                                                                    | <b>1 (-2×1)</b>                                                             |                 |
|                         |     |                   | +4e×3                 |               |                 | 5                             |                              |                              |                       | 5                             |                                                                                    | 1 (-2×1)                                                                    |                 |
|                         |     |                   | +6e×2                 |               |                 | 3                             | 1                            |                              | 3                     | 3                             |                                                                                    | 2 (-2×2)                                                                    |                 |
|                         |     |                   | +12e×1                |               |                 | 4                             |                              | 1                            | 2                     | 4                             |                                                                                    | 1 (-2×1)                                                                    |                 |

**Table S6. Reaction Products of FEC+DMC+LiPF<sub>6</sub> electrolytes after 5 ps of molecular dynamics run. Instead of dumping 12 electrons, various electron transfer rate is examined. Boldfaced cases indicate that there exist solvated electrons that do not participate bond breaking reaction yet.**

| Electrolyte Composition |     |                   |                       | Gas molecules |                 |                                 | PF <sub>6</sub> <sup>-</sup> |                              | Inorganic Salt        |                               | Organic Salt                                                                       |                                                                             |          |
|-------------------------|-----|-------------------|-----------------------|---------------|-----------------|---------------------------------|------------------------------|------------------------------|-----------------------|-------------------------------|------------------------------------------------------------------------------------|-----------------------------------------------------------------------------|----------|
| FEC                     | DMC | LiPF <sub>6</sub> | $\Delta n_e \times N$ | CO            | CO <sub>2</sub> | C <sub>2</sub> H <sub>3</sub> F | PF <sub>3</sub>              | PF <sub>2</sub> <sup>-</sup> | LiF (F <sup>-</sup> ) | CO <sub>3</sub> <sup>2-</sup> | Anion Radical (ch <sub>1</sub> ×# <sub>1</sub> , ch <sub>2</sub> ×# <sub>2</sub> ) | Merged (ch <sub>1</sub> ×# <sub>1</sub> , ch <sub>2</sub> ×# <sub>2</sub> ) |          |
| 25                      | 25  | 4                 | <b>+2e×6</b>          | <b>2</b>      |                 |                                 |                              |                              | <b>5</b>              |                               | <b>4 (-1×4)</b>                                                                    | <b>1 (-1×1)</b>                                                             |          |
|                         |     |                   | +4e×3                 | 1             |                 |                                 |                              |                              | 6                     |                               | 6 (-1×6)                                                                           |                                                                             |          |
|                         |     |                   | +6e×2                 | 2             |                 |                                 |                              |                              |                       | 6                             |                                                                                    | 5 (-1×5)                                                                    | 1 (-1×1) |
|                         |     |                   | +12e×1                | 6             |                 |                                 |                              |                              |                       | 6                             |                                                                                    | 6 (-1×6)                                                                    |          |
| 40                      | 10  | 4                 | <b>+2e×6</b>          | 3             |                 |                                 |                              |                              | 4                     |                               | 4 (-1×4)                                                                           | 2 (-2×2)                                                                    |          |
|                         |     |                   | +4e×3                 | 1             |                 |                                 | 1                            |                              | 7                     |                               | 5 (-1×4, -2×1)                                                                     |                                                                             |          |
|                         |     |                   | +6e×2                 | 3             |                 |                                 |                              |                              |                       | 5                             |                                                                                    | 7(-1×7)                                                                     |          |
|                         |     |                   | +12e×1                | 2             |                 | 1                               |                              |                              |                       | 5                             | 1                                                                                  | 4 (-1×4)                                                                    | 1 (-1×1) |

**Table S7. Reaction products when mass of hydrogen is used instead of tritium. FEC/DMC(25/25)+ Li<sup>+</sup>(20) case.**

| Electrolyte Composition |     |                   |               | Gas molecules |                 |                                    | PF <sub>6</sub> <sup>-</sup> | Inorganic Salt           |                               | Organic Salt              |                    |
|-------------------------|-----|-------------------|---------------|---------------|-----------------|------------------------------------|------------------------------|--------------------------|-------------------------------|---------------------------|--------------------|
| FEC                     | DMC | LiPF <sub>6</sub> | Excess Li     | CO            | CO <sub>2</sub> | C <sub>2</sub> H <sub>3</sub><br>F | PF <sub>3</sub>              | LiF<br>(F <sup>-</sup> ) | CO <sub>3</sub> <sup>2-</sup> | Anion Radical<br>(ch × #) | Merged<br>(ch × #) |
|                         |     |                   | Tritium mass  | 4             |                 | 1                                  | 1                            | 12                       | 1                             | 6 (-1×6)                  | 1 (-1×1)           |
|                         |     |                   | Hydrogen mass | 6             |                 | 1                                  | 1                            | 11                       | 1                             | 6 (-1×8)                  |                    |

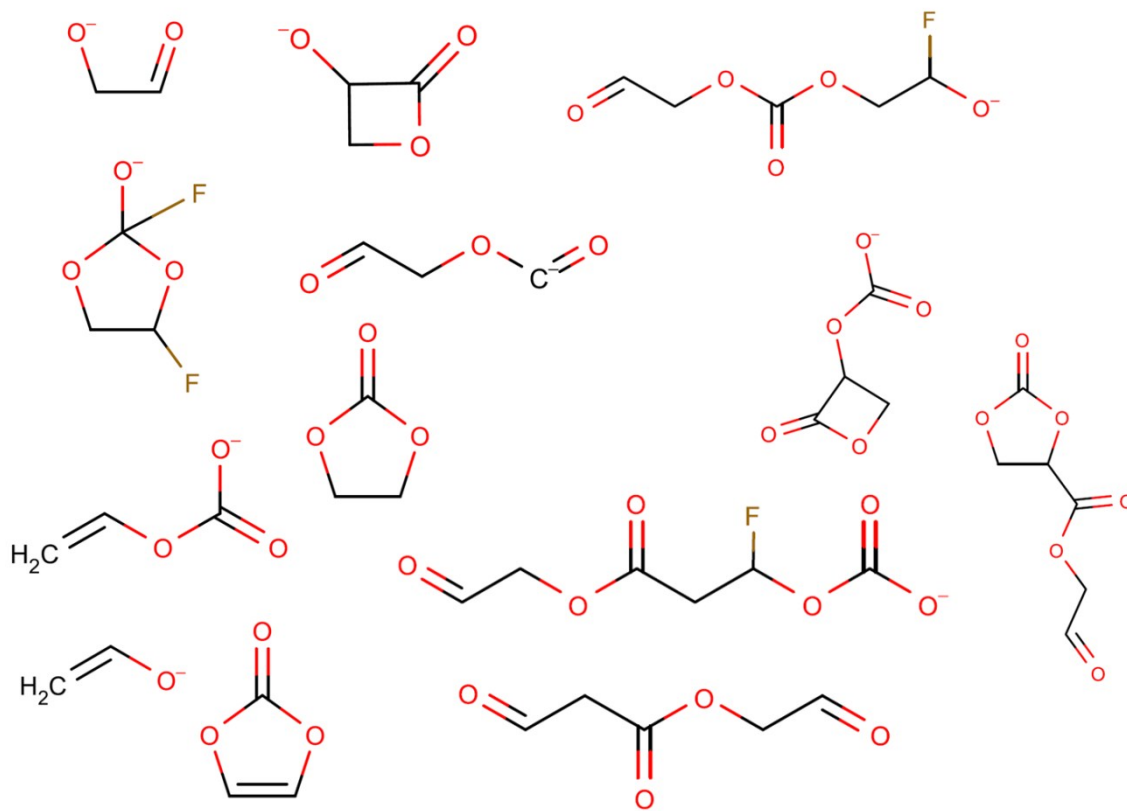

Figure S1. newly generated organic species out of FEC+DMC electrolyte.

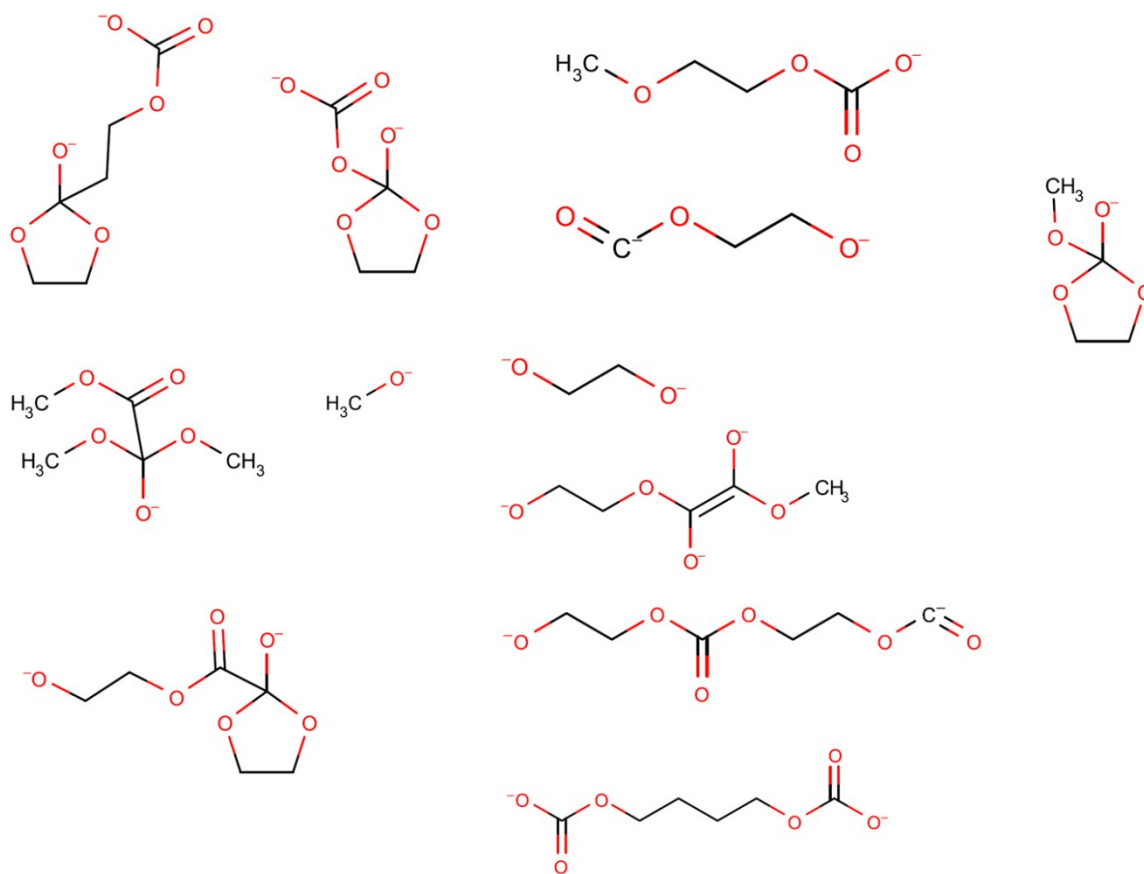

Figure S2. Newly generated organic species from EC+DMC electrolyte
